# Supplementary material for: Cardio-Respiratory Events and Food Autonomy Responses to Early Uni-Modal Orofacial Stimulation in Very Premature Babies: A Randomized, Controlled Study
Source: MDPI journal article supplement (doi:10.3390/children8121188), 2021-12-16
Supplement: s1 [file s1]

**Supplemental Table S1.** Nutritional follow-up at 6 months, corrected age, and children's QUALIN quality of life score at 6 and 12 months of age, as assessed by parents (experimental vs. control group).

| Follow-up                                                      | With OFS<br>(n = 15) | Without OFS<br>(n = 14) | P*   |
|----------------------------------------------------------------|----------------------|-------------------------|------|
| Number of breast feedings at 6 months<br>(artificial/maternal) | 15 (100)/ 0          | 14 (100)/ 0             | /    |
| Diversification at 6 months                                    | 15 (100)             | 14 (100)                | /    |
| Normal gag reflex at 6 months                                  | 15 (100)             | 14 (100)                | /    |
| Infant's quality of life as assessed by parents                |                      |                         |      |
| 6 months QUALIN Score                                          | 0.95 ± 0.26          | 0.90 ± 0.18             | 0.70 |
| 12 months QUALIN Score                                         | 1.06 ± 0.24          | 0.96 ± 0.27             | 0.36 |

Data are presented as n (%) unless stated differently; OFS: oro-facial stimulation; QUALIN Questionnaire: quality of life score for infants and very young children, comprising 34 items. Twelve-month follow-up: experimental group (n=13), control group (n=14). p: value of the difference between the groups with available data, obtained by  $\chi^2$  test. \*Value of p in univariate analysis. p < 0.05: statistically significant difference.

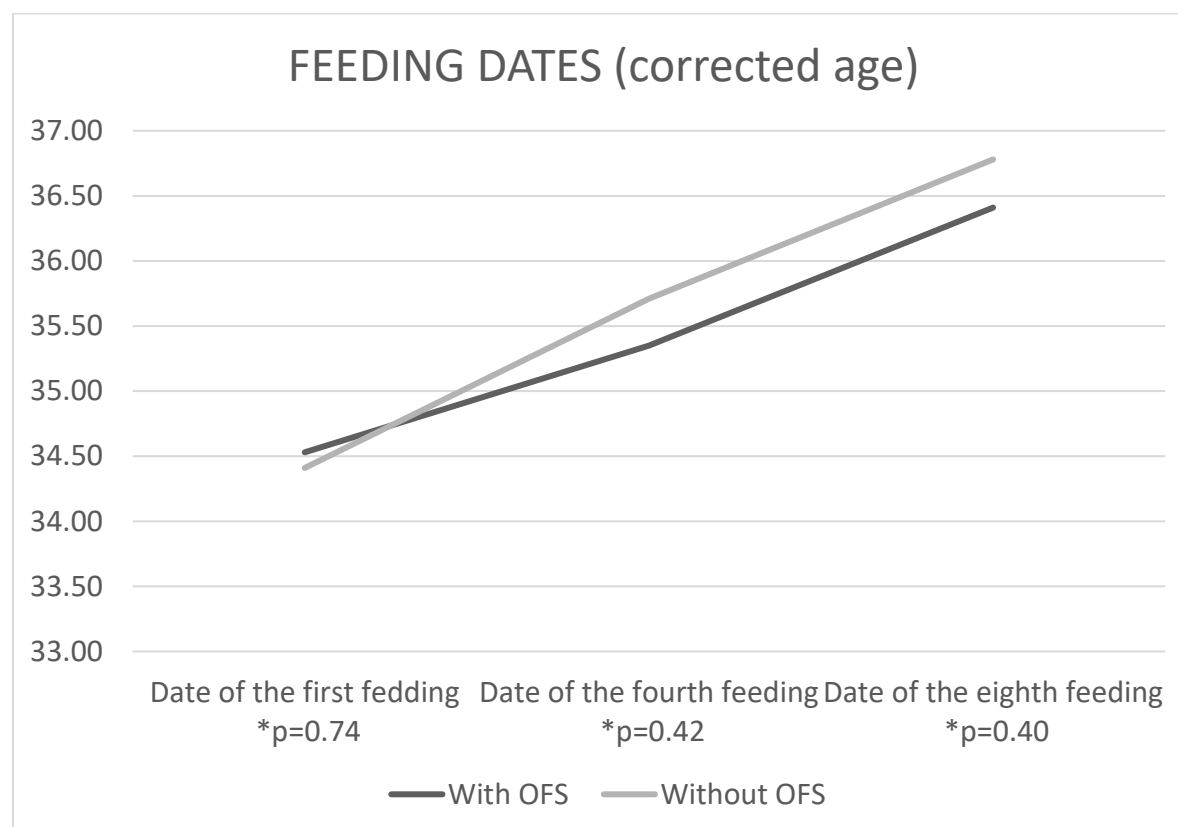

**Figure S1.** Experimental and control group dates of first, 4TH and 8TH independent feeds, Week GA-adjusted. Abbreviations: OFS: oro-facial stimulation. p value of the difference between the groups with available data, p < 0.05: statistically significant difference. \* Value of p in univariate analysis.
